# Supplementary material
Source: PubMed Central journal article supplement (PMC397422)
Supplement: pnas_101_15_5559__10.pdf [file pnas_101_15_5559__10.pdf]

**B**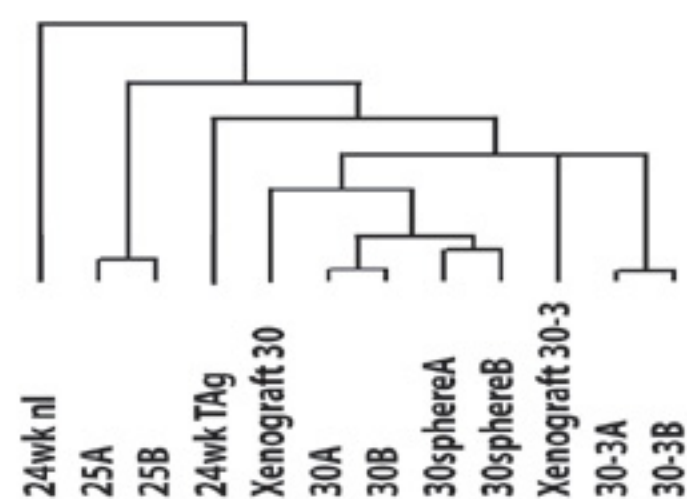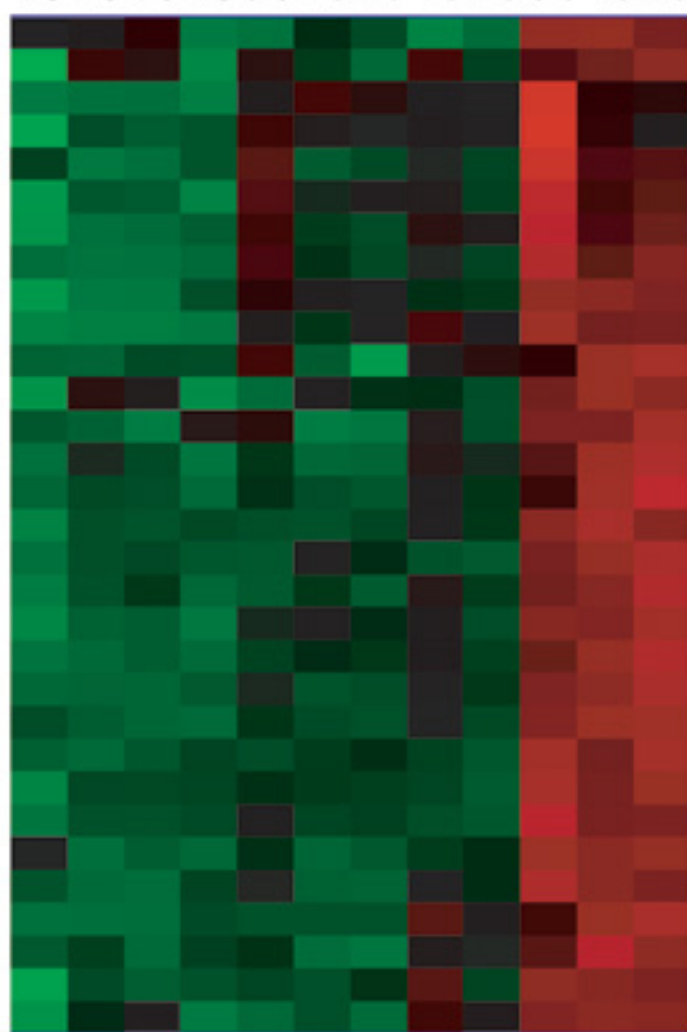

Rho GTPase activating protein 5  
 glutamate receptor, ionotropic, AMPA2 (alpha 2)  
 pleiomorphic adenoma gene-like 1  
 M11988:Homeo box A6 /cds=(0,293) /gb=M119  
 protein S (alpha)  
 src family associated phosphoprotein 2  
 interferon-induced protein with tetratricopeptide  
 calcitonin/calcitonin-related polypeptide, alpha  
 calcium/calmodulin-dependent protein kinase II  
 dopamine receptor 2  
 hypothetical protein 5031404N19  
 odd Oz/ten-m homolog 1 (Drosophila)  
 phosphoserine/threonine/tyrosine interaction protein  
 adaptor-related protein complex AP-4, sigma 1  
 RIKEN cDNA 4930578F06 gene  
 polymerase (DNA directed), epsilon 2  
 hypothetical protein 6720461H18  
 interferon-related developmental regulator 1  
 Neural precursor cell expressed, NEDD9  
 expressed sequence AU021838  
 proteasome subunit, alpha  
 transketolase  
 cofilin 2, muscle  
 ADP-ribosylation-like 4  
 melanoma antigen, family L, 2  
 DNA segment, Chr 14, ERATO DoI 817  
 RIKEN cDNA 2700097O09 gene  
 guanylate cyclase 2c  
 RIKEN cDNA 4930578F06 gene  
 RIKEN cDNA 0710001P09 gene  
 solute carrier family 7

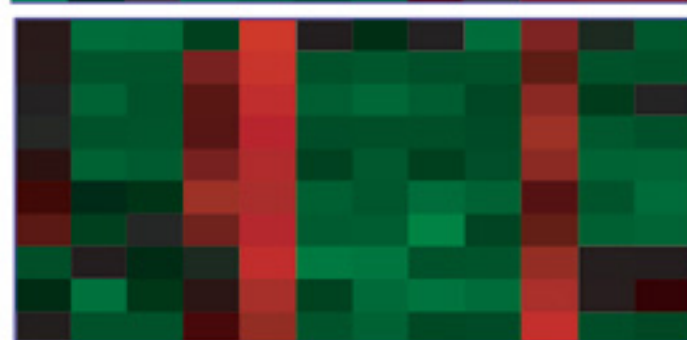

xanthine dehydrogenase  
 cathepsin S  
 matrix metalloproteinase 12  
 insulin-like growth factor binding protein 3  
 insulin-like growth factor binding protein 2  
 lectin, galactose binding, soluble 3  
 TYRO protein tyrosine kinase binding protein  
 proteasome (prosome, macropain) subunit, beta type 8  
 basic helix-loop-helix domain containing, class B2  
 regulator of G-protein signaling 5

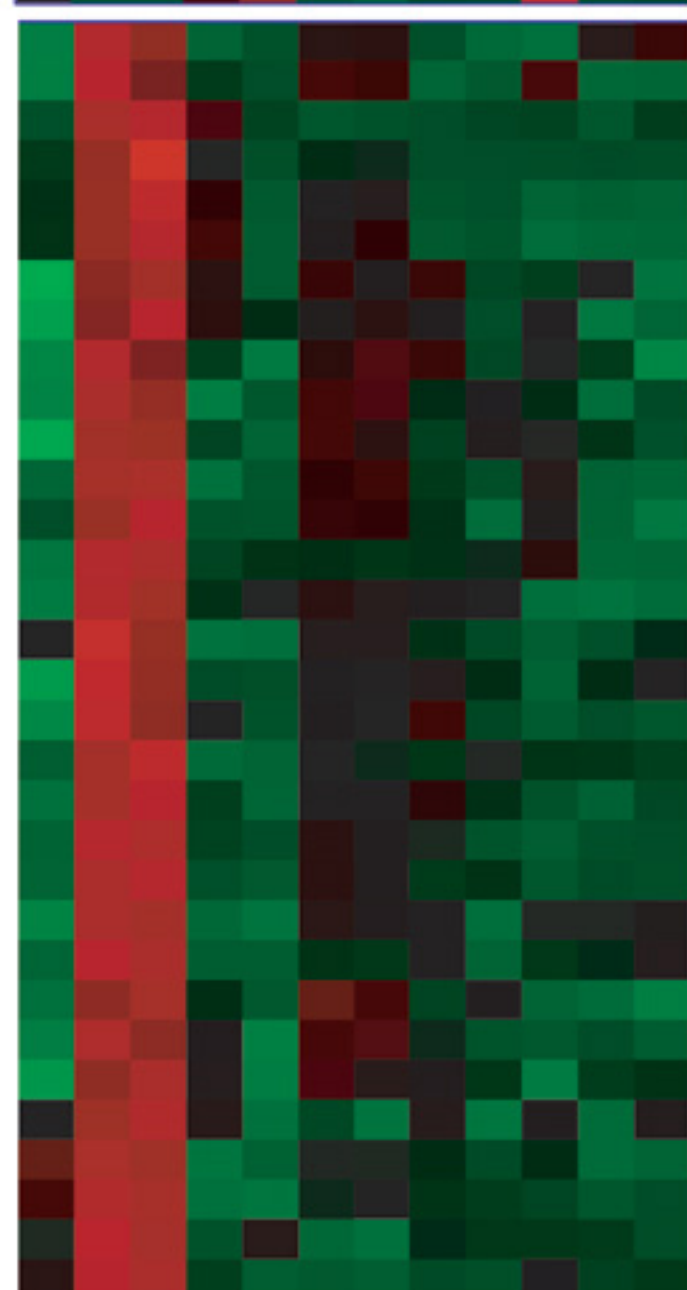

thyrotropin releasing hormone receptor  
 fibroblast growth factor 13  
 low density lipoprotein receptor-related protein 4  
 X05546:Murine (DBA/2) mRNA fragment for gag related peptide  
 X16670:Mouse RNA for type IIB intracisternal A-particle (IAP) element encoding int...  
 X04120:Intracisternal A particles, Thbd linked  
 cyclin E2  
 Mus musculus sodium channel 27 mRNA fragment.  
 RIKEN cDNA E430036I04 gene  
 single-minded 2  
 hyperpolarization-activated, cyclic nucleotide-gated K+ 2  
 activated leukocyte cell adhesion molecule  
 vacuolar protein sorting 35  
 somatostatin receptor 2  
 gamma-aminobutyric acid (GABA-A) receptor, subunit gamma 2  
 nuclear receptor interacting protein 1  
 brain derived neurotrophic factor  
 glycogenin 1  
 semaphorin 3A  
 origin recognition complex, subunit 4-like (S. cerevisiae)  
 glycoprotein m6b  
 hydroxysteroid (17-beta) dehydrogenase 7  
 RIKEN cDNA 5830406C15 gene  
 thrombospondin 1  
 DNA methyltransferase 3A  
 non-POU-domain-containing, octamer binding protein  
 retinoblastoma 1  
 multiple PDZ domain protein  
 aldehyde dehydrogenase family 1, subfamily A1  
 SH3 domain protein D19  
 X-linked lymphocyte-regulated 4  
 midline 2
